# Supplementary figures and images for: Astragalus Polysaccharides (PG2) Enhances the M1 Polarization of Macrophages, Functional Maturation of Dendritic Cells, and T Cell-Mediated Anticancer Immune Responses in Patients with Lung Cancer
Source: Preprints.org preprint supplement (doi:10.20944/preprints201908.0117.v1), 2019-08-09

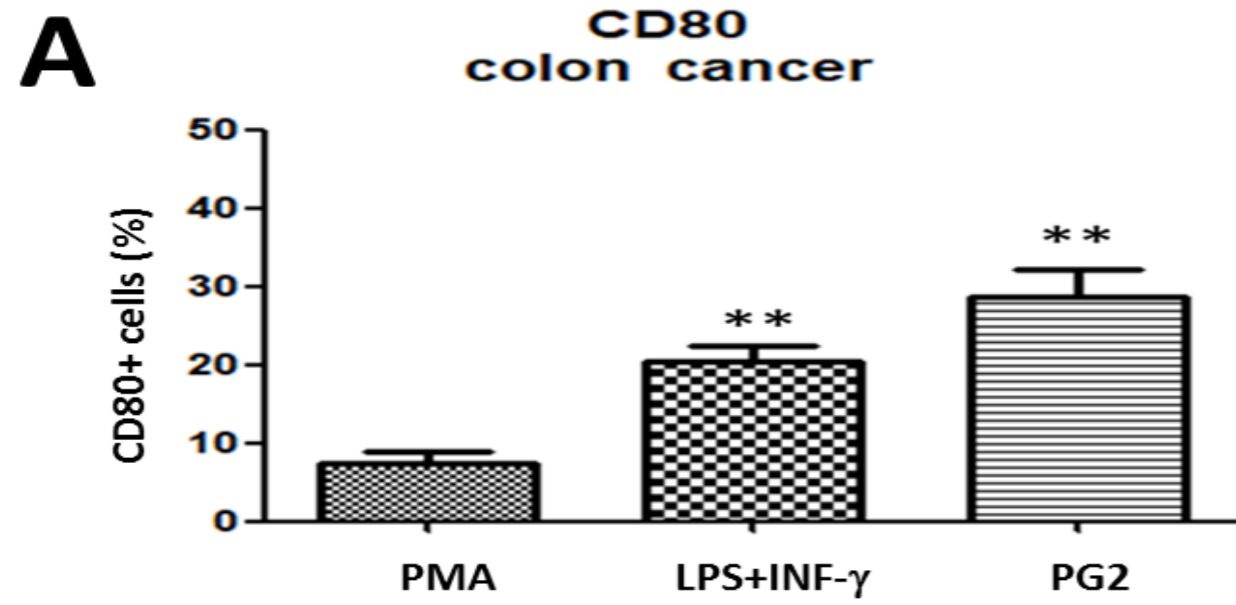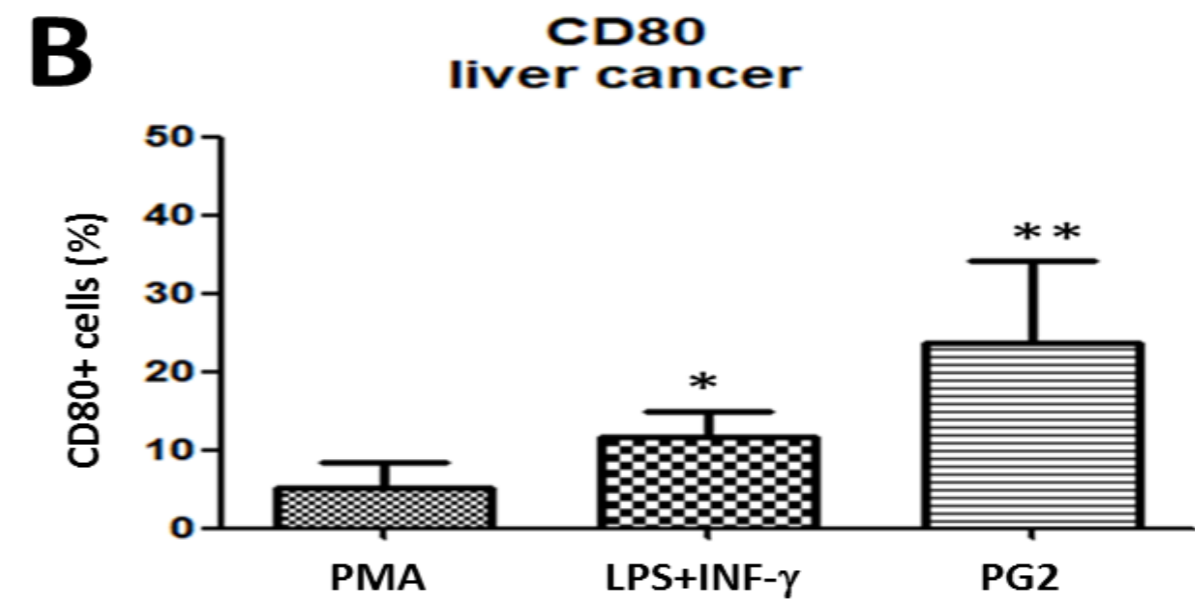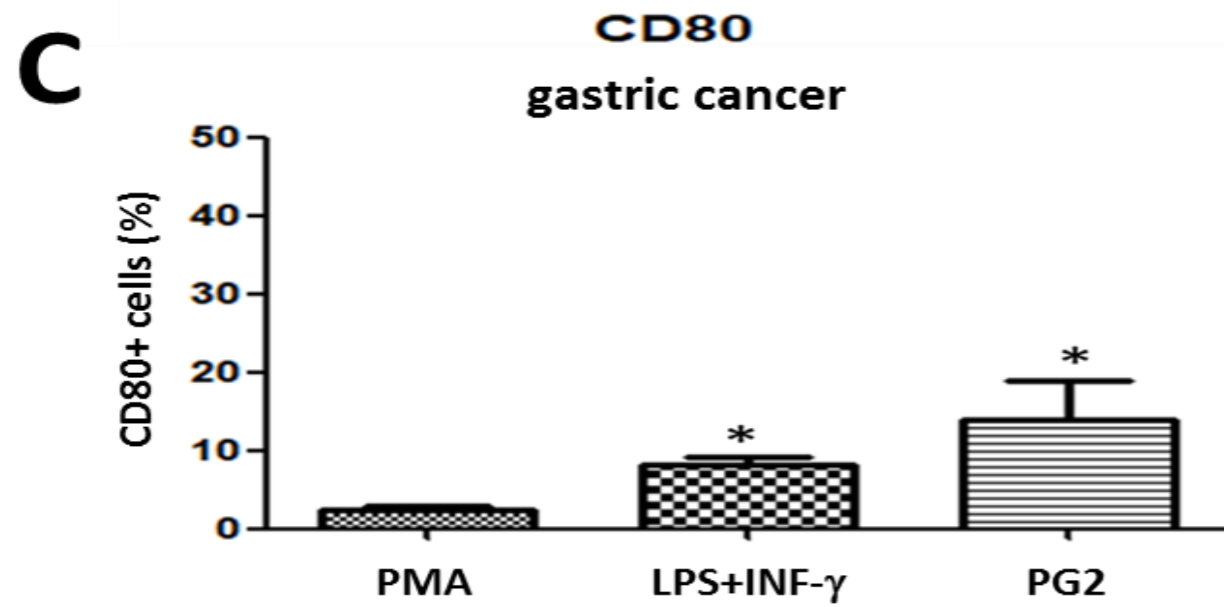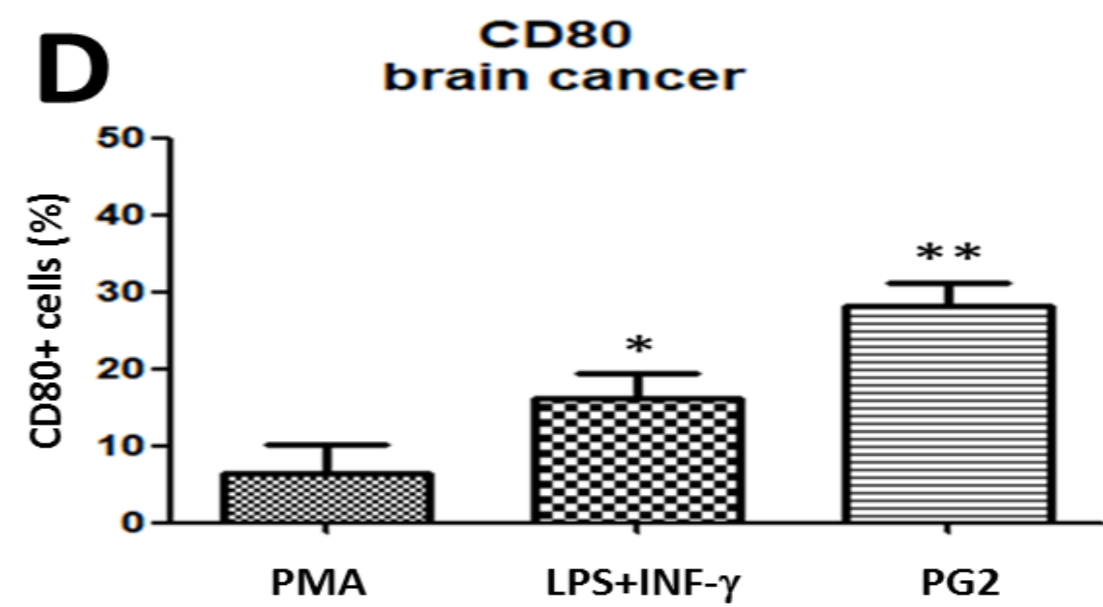

Supplementary Figure S1

Supplement: Supplementary file 1 [file supplementary]
